# Supplementary material for: Collagenase motors in gelatine-based hydrogels
Source: Royal Society of Chemistry journal article supplement (doi:10.1039/d3nr05712g), 2024-01-01
Supplement: d3nr05712g11.pdf [file d3nr05712g11.pdf]

Supporting Information

## Collagenase Motors in Gelatine-Based Hydrogels

Nanyang Wang,<sup>a</sup> Thaís Marcelino,<sup>a,b</sup> Carina Ade,<sup>a</sup> Stefan Pendlmayr,<sup>a,b</sup> Miguel A. Ramos Docampo,<sup>a</sup> and Brigitte Städler\*<sup>a</sup>

a. Interdisciplinary Nanoscience Center (iNANO), Aarhus University, Gustave Wieds Vej 14, 8000, Aarhus, Denmark

b. Sino-Danish Center for Education and Research, University of Chinese Academy of Sciences, Beijing, China

Email: \*bstadler@inano.au.dk

**Table S1.** Overview of the silica particle properties

| Silica Particle  | Mass (mg) <sup>a)</sup> | Surface area (μm <sup>2</sup> ) <sup>a)</sup> | Diameter (μm) <sup>a)</sup>                       |
|------------------|-------------------------|-----------------------------------------------|---------------------------------------------------|
| <sup>0.5</sup> M | 1 × 10 <sup>-10</sup>   | 0.8                                           | 0.5                                               |
| <sup>0.8</sup> M | 6 × 10 <sup>-10</sup>   | 2.0                                           | 0.8                                               |
| <sup>1</sup> M   | 1 × 10 <sup>-9</sup>    | 3.1                                           | 1.0                                               |
| <sup>4</sup> M   | 9 × 10 <sup>-9</sup>    | 12.6                                          | 2.0                                               |
| <sup>R</sup> M   | 2 × 10 <sup>-10</sup>   | 1.4                                           | 1.5 (width)<br>0.3 (length)<br>5.6 (aspect ratio) |

<sup>a)</sup> of a single particle

**Table S2.** Overview of the collagenase immobilization characteristics

| Motor                                  | Silica particle stock solution (mg mL <sup>-1</sup> ) | Particle V (polymer brush coated) (μL) <sup>a)</sup> | Mass of Coll for immobilization (mg) <sup>b)</sup> | Total mass of Coll/Total area of motor (μg μm <sup>-2</sup> ) <sup>c)</sup> |
|----------------------------------------|-------------------------------------------------------|------------------------------------------------------|----------------------------------------------------|-----------------------------------------------------------------------------|
| <sup>R</sup> M <sup>Coll</sup>         |                                                       |                                                      | 1.5                                                | 4 × 10 <sup>-8</sup>                                                        |
| <sup>0.5</sup> M <sup>Coll</sup>       | 30                                                    | 66                                                   | 1.4                                                | 5 × 10 <sup>-8</sup>                                                        |
| <sup>0.8</sup> M <sup>Coll</sup>       | 50                                                    | 60                                                   | 1.6                                                | 9 × 10 <sup>-8</sup>                                                        |
| <sup>1</sup> M <sup>Coll</sup>         | 50                                                    | 80                                                   | 3.2                                                | 3 × 10 <sup>-8</sup>                                                        |
| <sup>2</sup> M <sup>Coll</sup>         | 50                                                    | 180                                                  | 2.4                                                | 8 × 10 <sup>-8</sup>                                                        |
| <sup>0.5</sup> M <sup>Coll</sup> (low) | 30                                                    | 45                                                   | 0.4                                                | NA <sup>d)</sup>                                                            |

<sup>a)</sup>particle volume used for Coll coating to have comparable total surface area of 1 × 10<sup>10</sup> μm<sup>2</sup>; <sup>b)</sup>from a 4 mg ml<sup>-1</sup> Coll stock solution in HEPES buffer; <sup>c)</sup>experimentally determined from a BCA analysis (n=2); <sup>d)</sup>below the detection limit of the BCA analysis.

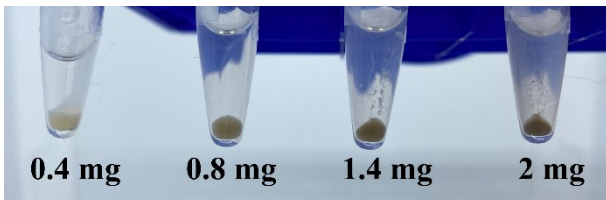

**Figure S1.** Photo of  $0.5\text{M}^{\text{Coll}}$  after being coated with different amounts of collagenase.  $0.5\text{M}^{\text{Coll}(\text{low})}$  and  $0.5\text{M}^{\text{Coll}}$  correspond to the first tube (0.4 mg collagenase) and third tube (1.4 mg collagenase).

a) Trajectories

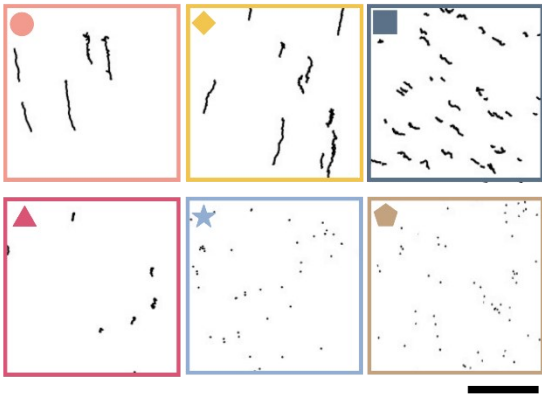

b) MSD

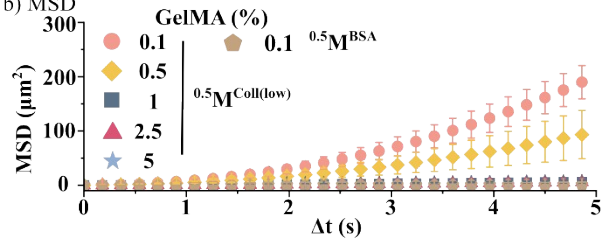

c) Velocity

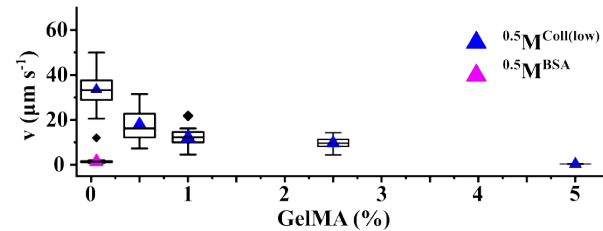

**Figure S2.** Locomotion properties of  $0.5\text{M}^{\text{Coll}(\text{low})}$ . Trajectories maps (a) and MSD plots (b) of  $0.5\text{M}^{\text{Coll}(\text{low})}$  moving in different viscosity gelatine-based environments when triggered with 2 mM calcium. Scale bar is 50  $\mu\text{m}$ . c) Velocities of  $0.5\text{M}^{\text{Coll}(\text{low})}$  represented as whisker plots.  $0.5\text{M}^{\text{BSA}}$  is used as control.

a) Locomotion properties of  $0.5\text{M}$  and  $0.5\text{M}^{\text{Coll}}$

i) Trajectories ii) MSD

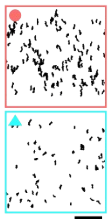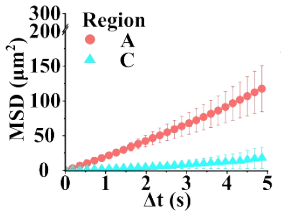

iii) Velocity

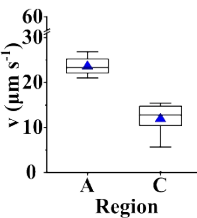

b) Locomotion properties of  $0.5\text{M}^{\text{BSA}}$  and  $0.5\text{M}$

i) MSD

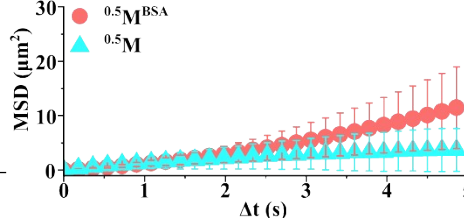

ii) Velocity

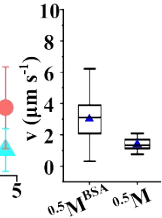

**Figure S3.** a) Mixture of motors  $0.5\text{M}$  and  $0.5\text{M}^{\text{Coll}}$  in the regions A (close to the inlet) and C (at the other end of the microfluidic channel). Trajectories maps (i) and MSD plots (ii) of  $0.5\text{M}^{\text{Coll}}$  and  $0.5\text{M}$  moving in an environment made of 1% GelMA when triggered with 2 mM calcium. Scale bar is 100  $\mu\text{m}$ . iii) Velocities of  $0.5\text{M}^{\text{Coll}}$  and  $0.5\text{M}$  represented as whisker plots. b) i) MSD plots of  $0.5\text{M}^{\text{BSA}}$  and  $0.5\text{M}$  in 1% GelMA using 2 mM calcium as the trigger (not as a mixed population). ii) Velocities of  $0.5\text{M}^{\text{BSA}}$  and  $0.5\text{M}$  represented as whisker plots.

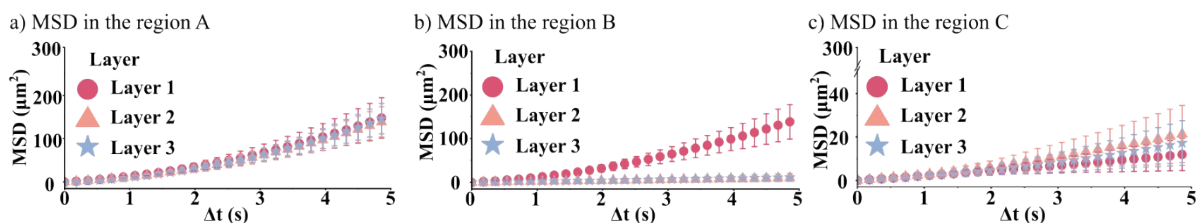

**Figure S4.** MSD plots of  $^{0.5}M^{Coll}$  in the region A (a), the region B (b) and the region C (c) in 1 % GelMA using 2 mM calcium as the trigger.

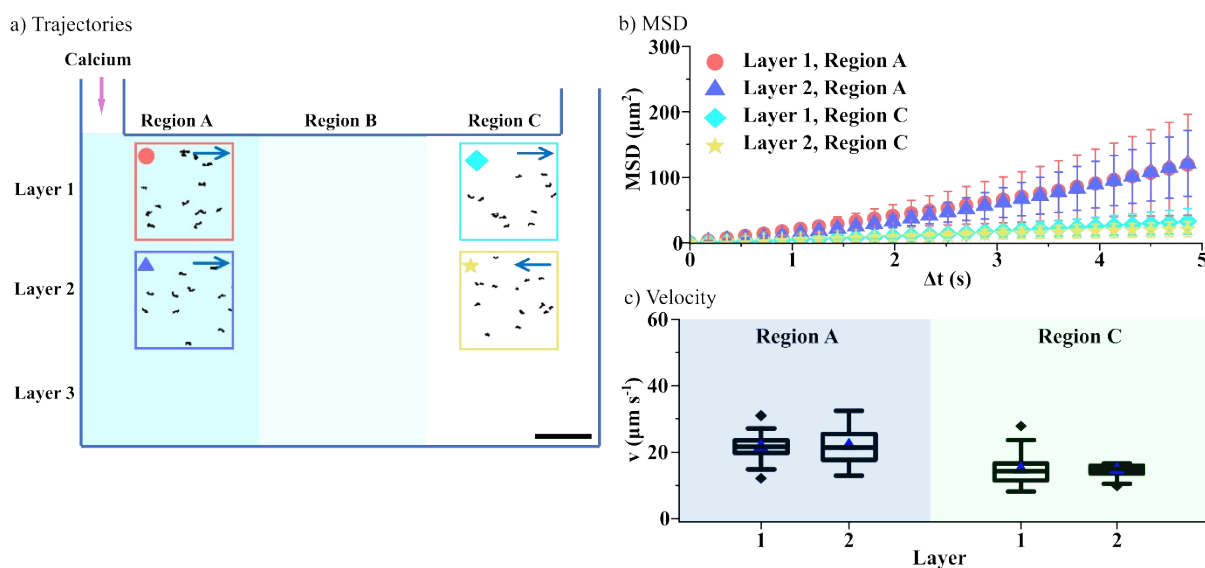

**Figure S5.** Motors  $^{0.5}M$  and  $^{0.5}M^{Coll}$  in different positions. Trajectories maps (a) and MSD plots (b) of  $^{0.5}M^{Coll}$  and  $^{0.5}M$  moving in an environment made of 1% GelMA when triggered with 2 mM calcium. Scale bar is 50  $\mu\text{m}$ . c) Velocities of  $^{0.5}M^{Coll}$  and  $^{0.5}M$  represented as whisker plots.

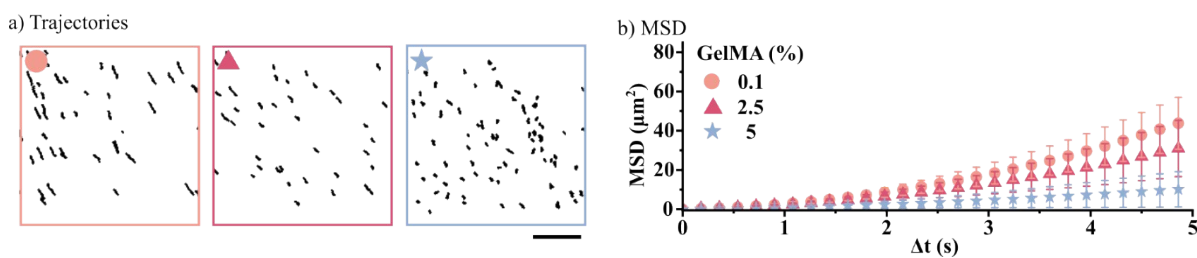

**Figure S6.** Trajectory maps (a) and MSD plots (b) of  $^{0.8}M^{Coll}$  in hydrogels made from 0.1, 2.5, or 5 % GelMA using 2 mM calcium as the trigger. Scale bar is 100  $\mu\text{m}$ .

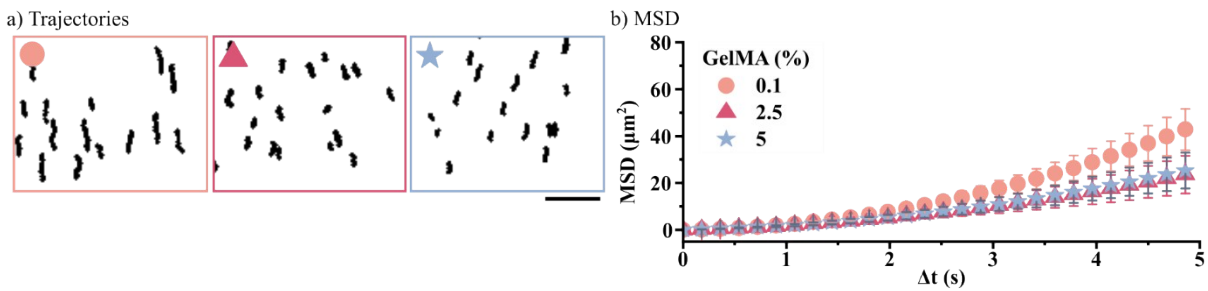

**Figure S7.** Trajectory maps (a) and MSD plots (b) of  $^1M^{Coll}$  in hydrogels made from 0.1, 2.5, or 5 % GelMA using 2 mM calcium as the trigger. Scale bar is 100  $\mu m$ .

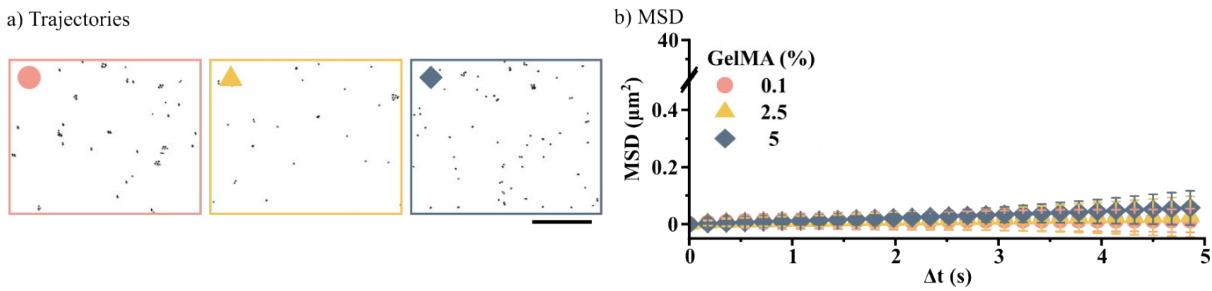

**Figure S8.** Trajectory maps (a) and MSD plots (b) of  $^2M^{Coll}$  in hydrogels made from 0.1, 2.5, or 5 % GelMA using 2 mM calcium as the trigger. Scale bar is 50  $\mu m$ .

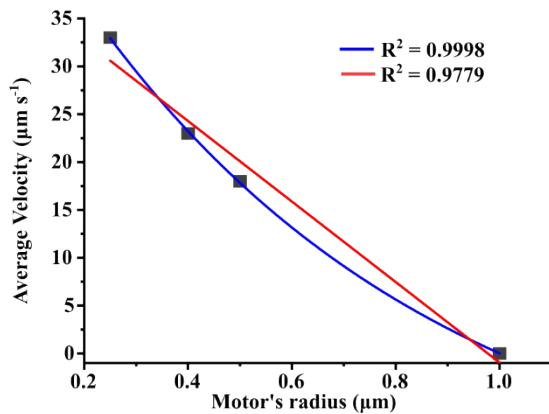

**Figure S9.** Plot of velocity vs. motor's radius comparing a linear (red) and an exponential fit (blue). Theory predicts a linear dependence of velocity and particle radius for slow particles moving in continuous fluids, while a non-linear dependence is expected for fast particles and complex environments.

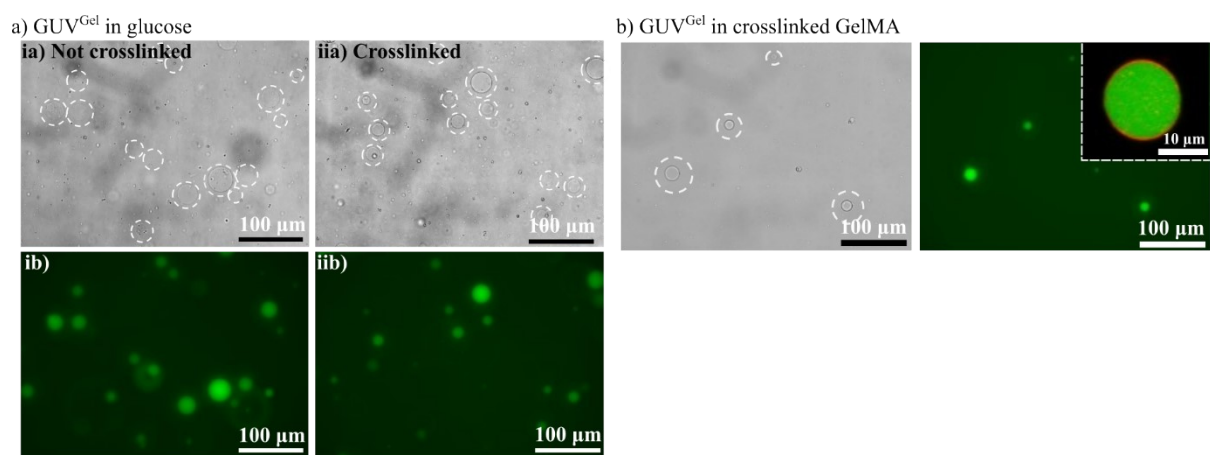

**Figure S10.** a) Representative fluorescence inverted microscope image of  $\text{GUV}^{\text{Gel}}$  in glucose buffer before and after UV crosslinking. b) Representative fluorescence inverted microscope image of  $\text{GUV}^{\text{Gel}}$  in crosslinked gelatine.
